# Supplementary material
Source: publisher site journal article supplement (https://www.spandidos-publications.com/4206/downloadSupplementary)

Figure S1. Assessment of different behavioral tests.

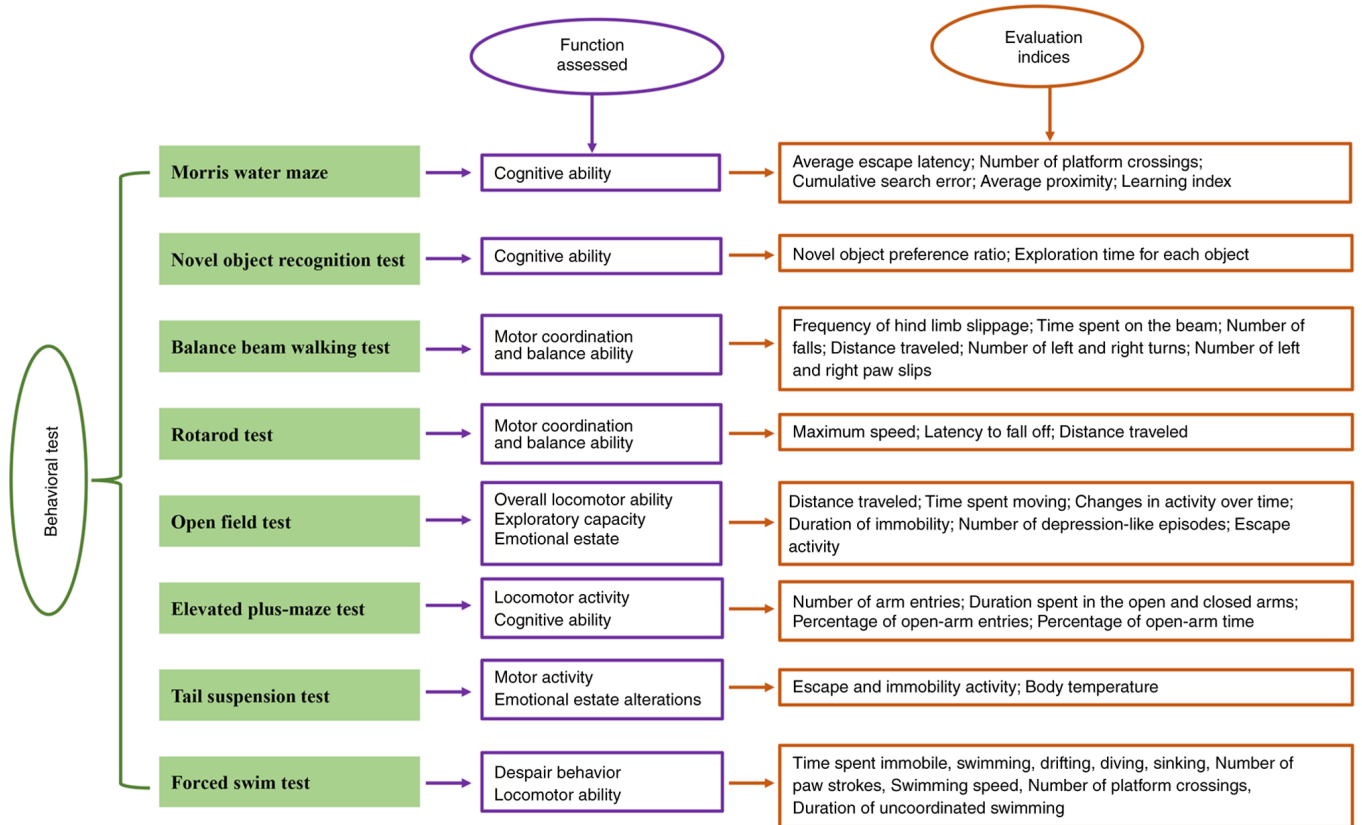

Supplement: Supplementary file 1 [file downloadSupplementary]
